# Supplementary material for: The Kelch13 compartment contains highly divergent vesicle trafficking proteins in malaria parasites
Source: PubMed Central journal article supplement (PMC10718435; doi:10.1371/journal.ppat.1011814), 2023-12-01
Supplement: ppat.1011814.s011.pdf [file ppat.1011814.s011.pdf]

| Table S1      |                                                                       |                        |                                                                 |                                 |
|---------------|-----------------------------------------------------------------------|------------------------|-----------------------------------------------------------------|---------------------------------|
| Gene ID       | PlasmoDB annotation                                                   | Protein Name or Symbol | average log2 Ratio normalized Kelch13 from Birnbaum et al. 2020 | proteins analyzed in this study |
| PF3D7_1343700 | kelch protein K13                                                     | K13                    | 6.29                                                            |                                 |
| PF3D7_0606000 | protein KIC1                                                          | KIC1                   | 4.43                                                            |                                 |
| PF3D7_1227700 | protein KIC2                                                          | KIC2                   | 4.03                                                            |                                 |
| PF3D7_1246300 | protein KIC4                                                          | KIC4                   | 3.83                                                            |                                 |
| PF3D7_0914400 | protein KIC4                                                          | KIC3                   | 3.64                                                            |                                 |
| PF3D7_1438400 | metacaspase-like protein                                              | MCA2                   | 3.63                                                            | X                               |
| PF3D7_1025000 | Eps15-like protein                                                    | Eps15                  | 3.50                                                            |                                 |
| PF3D7_1138700 | protein KIC5                                                          | KIC5                   | 3.39                                                            |                                 |
| PF3D7_1243400 | conserved Plasmodium protein, unknown function                        |                        | 3.24                                                            | X                               |
| PF3D7_0813000 | protein KIC7                                                          | KIC7                   | 3.13                                                            |                                 |
| PF3D7_1442400 | protein KIC9                                                          | KIC9                   | 3.03                                                            |                                 |
| PF3D7_0609700 | protein KIC6                                                          | KIC6                   | 2.98                                                            |                                 |
| PF3D7_0104300 | ubiquitin carboxyl-terminal hydrolase 1, putative                     | UBP1                   | 2.90                                                            |                                 |
| PF3D7_0204300 | <i>conserved Plasmodium protein, unknown function</i>                 |                        | 2.84                                                            |                                 |
| PF3D7_1014900 | protein KIC8                                                          | KIC8                   | 2.78                                                            |                                 |
| PF3D7_0915400 | ATP-dependent 6-phosphofructokinase                                   | PFK9                   | 2.58                                                            |                                 |
| PF3D7_1365800 | <i>conserved Plasmodium protein, unknown function</i>                 |                        | 2.53                                                            | X                               |
| PF3D7_1122500 | protein KIC10                                                         | KIC10                  | 2.44                                                            |                                 |
| PF3D7_1447800 | calponin homology domain-containing protein, putative                 |                        | 2.19                                                            | X                               |
| PF3D7_1142100 | conserved Plasmodium protein, unknown function                        | KIC11*                 | 1.65                                                            | X                               |
| PF3D7_1345600 | inner membrane complex protein                                        |                        | 1.55                                                            |                                 |
| PF3D7_0103100 | <i>vacuolar protein sorting-associated protein 51, putative</i>       | VP51                   | 1.55                                                            | X                               |
| PF3D7_0109000 | <i>photosensitized INA-labeled protein PHIL1, putative</i>            | PHIL1                  | 1.49                                                            |                                 |
| PF3D7_1117900 | <i>conserved Plasmodium protein, unknown function</i>                 |                        | 1.46                                                            |                                 |
| PF3D7_0408100 | conserved Plasmodium protein, unknown function                        |                        | 1.45                                                            |                                 |
| PF3D7_1247400 | peptidyl-prolyl cis-trans isomerase FKBP35                            | FKBP35                 | 1.45                                                            |                                 |
| PF3D7_0721100 | <i>conserved Plasmodium protein, unknown function</i>                 |                        | 1.42                                                            |                                 |
| PF3D7_1016200 | <i>Rab3 GTPase-activating protein non-catalytic subunit, putative</i> |                        | 1.41                                                            |                                 |
| PF3D7_0708400 | heat shock protein 90                                                 | HSP90                  | 1.41                                                            |                                 |
| PF3D7_1329100 | myosin F                                                              | MyoF                   | 1.32                                                            | X                               |
| PF3D7_1329500 | conserved Plasmodium protein, unknown function                        | KIC12*                 | 1.32                                                            | X                               |
| PF3D7_0717600 | conserved Plasmodium protein, unknown function                        | IMC32                  | 1.30                                                            |                                 |
| PF3D7_0405700 | lysine decarboxylase, putative                                        | UIS14                  | 1.23                                                            | X                               |
| PF3D7_0907200 | <i>GTPase-activating protein, putative</i>                            |                        | 1.15                                                            | X                               |
| PF3D7_0822900 | <i>conserved Plasmodium protein, unknown function</i>                 | PIC2                   | 1.15                                                            |                                 |
| PF3D7_1018200 | <i>serine/threonine protein phosphatase 8, putative</i>               | PPP8                   | 1.13                                                            |                                 |
| PF3D7_1141300 | conserved Plasmodium protein, unknown function                        | APR1                   | 1.11                                                            |                                 |

KICs (Birnbaum et al. 2020)  
new candidates  
new candidates not analyzed  
BioID baits (Birnbaum et al. 2020)  
considered false positives / IMC proteins  
renamed in current manuscript  
\*  
*italic* less stringent filtering group (significant with FDR<1% in 2 out of 4 reactions of any bait (Birnbaum et al. 2020))
