# Supplementary material for: The Kelch13 compartment contains highly divergent vesicle trafficking proteins in malaria parasites
Source: PubMed Central journal article supplement (PMC10718435; doi:10.1371/journal.ppat.1011814), 2023-12-01
Supplement: ppat.1011814.s012.pdf [file ppat.1011814.s012.pdf]

| Table S2: Oligonucleotides         |                                                                         |
|------------------------------------|-------------------------------------------------------------------------|
| name                               | sequence                                                                |
| MCA2(wt)-3xHA-T2A-Neo fw           | ggtgacctatagaataactcaagctcggccgcTAATGAGTACTACCAGATGACATCAAATTTTTATCAC   |
| MCA2(wt)-3xHA-T2A-Neo rv           | CTGGAAACATCGTATGGGTACATGGTGGTACCGGAAACACATTTAATATTTCAAATCGATAATACC      |
| MCA2(wt)-3xHA int check fw         | GGAATATAATTTGAAATATGTAATAATTTAAACTGTCC                                  |
| MCA2(wt)-3xHA int check rv         | CATAAACCAAAAATTTAAAGATGGAGTGG                                           |
| MCA2 (Y1334.)-GFP fwd              | ggtgacctatagaataactcggccgctaaAATAATTTTAGCAAACAAAATTTTTAGATAAAATTTTTATG  |
| MCA2 (Y1334.)-GFP rev              | CAGCACCAGCAGCAGCACCTCTAGCacgcgtTTTTTTTAAATTTTCATATAACTTTTTATTTTGGTC     |
| Intcheck 5UTR MCA2 (Y1344.) fw     | ATCCATAACAATAATAATAATTGAGTGG                                            |
| Intcheck 3UTR MCA2 (Y1344.) rv     | AACTTTTTTGTGGTATCTTTGTCAAGC                                             |
| PfMyosinC NotI fwd                 | cagtgcggccgctaaataglaataaaacatagatgaag                                  |
| PfMyosinC AvrII rev                | cagtcctaggtacaaaagacctgcgccagaaaac                                      |
| Intcheck 5UTR MyoF wt fw           | CAAATTTATCAGGTCATAAAAAGCAATAACATG                                       |
| Intcheck 3UTR MyoF wt rv           | ATATATATATATGAACAAAATTTACAATATC                                         |
| MyoF intcheck fw JSW175            | GGCACACTTAAATCATATGAAC                                                  |
| MyoF intcheck rv JSW176            | catgtgaatagaaaagtaaac                                                   |
| MyoF(wt)-3xHA-T2A-Neo fw           | gctatttaggtgacctatagaataactcaagctcggccgcTAATCTCAGAAGATAAAAATTTTTCATCATC |
| MyoF(wt)-3xHA-T2A-Neo rv           | CGTAATCTGGAACATCGTATGGGTACATGGTGGTACCTACAAAAGACCTGCCCGAGAAAACACTAG      |
| KIC11 TGD fw                       | gctatttaggtgacctatagaataactcggccgctaaAACGATAAAAAGAATAGCATTAAATAAAAG     |
| KIC11 TGD rv                       | cagcaccagcagcagcactctagcagcgtTATATGATTATCTTTTATTTATAG                   |
| KIC11 fw                           | gctatttaggtgacctatagaataactcggccgctaaGATGATGCTGACGAGGAGGAAGAAG          |
| KIC11 rv                           | CAGCAGATCTTGATCTCAATCTGAcctaggTTTTTATCCTTTGTTTTAAGTTTAT                 |
| KIC11 int check 5 fw               | ATGTAACATATGATAATAATAATG                                                |
| KIC11 int check 3 rv               | TATTA AAAAGAATTTTCATTTGATG                                              |
| KIC12fw                            | gctatttaggtgacctatagaataactcggccgctaaAGAGTGGTGGTAGTAACAACAATAG          |
| KIC12 rv                           | CAGCAGATCTTGATCTCAATCTGAcctaggATAATTTAACTCTGGGTGACCACTAAAC              |
| KIC12 TGD fw                       | gctatttaggtgacctatagaataactcggccgctaaGACAATTTATATTATAAATAATATAC         |
| KIC12 TGD rv                       | cagcaccagcagcagcactctagcagcgtCATGTTTTCTTGGCATTATAAAATG                  |
| KIC12 int check 5 fw               | TTACAGCATATGTAAGAATTTCATC                                               |
| KIC12 int check 3 rv               | TTTCCAATCAACCTATATATGTGTG                                               |
| KIC12 TGD int check 5 fw           | AATGGCATATTTCTATTTTCGTGTG                                               |
| KIC12 TGD int check 3 rv           | AACATCAAGCAAAAATAACATCC                                                 |
| VPS51 fw                           | tatttaggtgacctatagaataactcggccgctaaAGTGATGATGATAAAAAATTTGAAG            |
| VPS51 rv                           | AGCAGCAGATCTTGATCTCAATCTGAcctaggCTCTTTAAACATTTTCAATATAAATAATTTATTTTC    |
| VPS51 int check 5 fw               | TGAAGGACAGGAAAGAGAATATG                                                 |
| VPS 51 int check 3 rv              | ATGAATCTATCTTTCTTTACTC                                                  |
| VPS51 TGD fw                       | gctatttaggtgacctatagaataactcggccgctaaAATAAAAATAATAGAAGAAAAAATG          |
| VPS51 TGD rv                       | ccagcaccagcagcagcactctagcagcgtCTTTTCGATTTATTTAATAATC                    |
| VPS51 TGD int check 5 fw NEW       | cgctggagtcctcctaatttg                                                   |
| VPS 51 TGD int check 3 rv NEW      | GATGTACACATTTGTTATTATCCC                                                |
| PF3D7_1243400 rv                   | AGCAGCAGCAGATCTTGATCTCAATCTGAcctaggAGAAGCTACCTTTTGTTATTTCC              |
| PF3D7_1243400fw                    | aagctatttaggtgacctatagaataactcggccgctaaGAGAACGAACAAAAGATATCCTTC         |
| PF3D7_1447800 fw                   | gctatttaggtgacctatagaataactcggccgctaaAATAATATACATAATAATAAATAAC          |
| PF3D7_1447800 rv                   | CAGCAGATCTTGATCTCAATCTGAcctaggATCTTGACCTGTGATCATATTTTC                  |
| PF3D7_1447800 int check 5 fw       | ATGATAAAAATAAATAATGCACATAG                                              |
| PF3D7_1447800check 3 rv            | AGCAATATATCTAACCAATGGACAC                                               |
| PF3D7_1365800 fw                   | gctatttaggtgacctatagaataactcggccgctaaatatttagAAATTCAGTATCAGG            |
| PF3D7_1365800 rv                   | CAGCAGATCTTGATCTCAATCTGAcctaggTTGGGGGAATATAGTGTAATATTAG                 |
| PF3D7_1365800 int check 5 fw       | tatatgacacattatatttac                                                   |
| PF3D7_1365800 int check rv NEW JSW | gtgatgcatataataatgttgac                                                 |
| PfUIS14fw                          | gctatttaggtgacctatagaataactcggccgctaaATTGTAATATGTTAAAAAATGTG            |
| PfUIS14 rv                         | CAGCAGATCTTGATCTCAATCTGAcctaggCTTGTTGTTGGTTTCACAGTCATC                  |
| PfUIS14 TGD fw                     | gctatttaggtgacctatagaataactcggccgctaaGAAACAATATAGATCAGAATAAATC          |
| PfUIS14 TGD rv                     | cagcaccagcagcagcactctagcagcgtATAATTTATCTCATGTAATTTTCTG                  |
| PfUIS14 int check 5 fw             | CTAGCTAGTAATAACAATTTTGTG                                                |
| PfUIS14 int check 3 rv             | ATATAATATATAAATCCATGCTG                                                 |
| PfUIS14 TGD int check 5 fw         | TTTCAAATCGATGAGGATCTTTAC                                                |
| PfUIS14 TGD int check 3 rv         | TAGAACTCTTTATATTTTTTATC                                                 |
| PF3D7_0907200 fw                   | gctatttaggtgacctatagaataactcggccgctaaTGCATGAACCTAATATGTGTGATAATG        |
| PF3D7_0907200 rv                   | CAGCAGATCTTGATCTCAATCTGAcctaggAAATGTTGAGCATCGTCTACCAG                   |
| PF3D7_0907200 int check 5 fw       | TAATCAAAATATAAAAATCATCAC                                                |
| PF3D7_0907200 int check 3 rv       | TCAGAAAAAAAATTTAATTATACG                                                |
| PF3D7_1243400 TGD fw               | caatagaataactcggccgctaaTTCCAGTTTTAATAA                                  |
| PF3D7_1243400 TGD rv               | ctgatataactctgctgcttaaacCTTCTCTGGTTATCTTGTGTA                           |
| ama1 fw NotI                       | GGTGACACTATAGAATACTCggccgctaaGAGGTGTGTTGGGAAACAGAAAG                    |
| ama1 rv KpnI                       | TCCTgggtaccTTTGACAAATTTAACAAGTAC                                        |
| IMC1c fw KpnI                      | CTCGgtaccATGGCAGATTCATCAAAAGTTCAACAG                                    |
| ARO fw KpnI                        | CTCGgtaccATGGGAAATAATTGCTGTGCAGGAAG                                     |
| AMA1 fw KpnI                       | CTCGgtaccATGAGAAAATTTACTGCGTATTATTATG                                   |
| mCherry rv XmaI                    | GAACATTAAGCTGCCATATCCCTGACCCGGTTACTTGTACAGCTCGTCCATGCCGCC               |
